# Supplementary material for: Spatio-Temporal Expression Pattern of CAKUT Candidate Genes DLG1 and KIF12 during Human Kidney Development
Source: MDPI journal article supplement (doi:10.3390/biom13020340), 2023-02-09
Supplement: s1 [file s1]

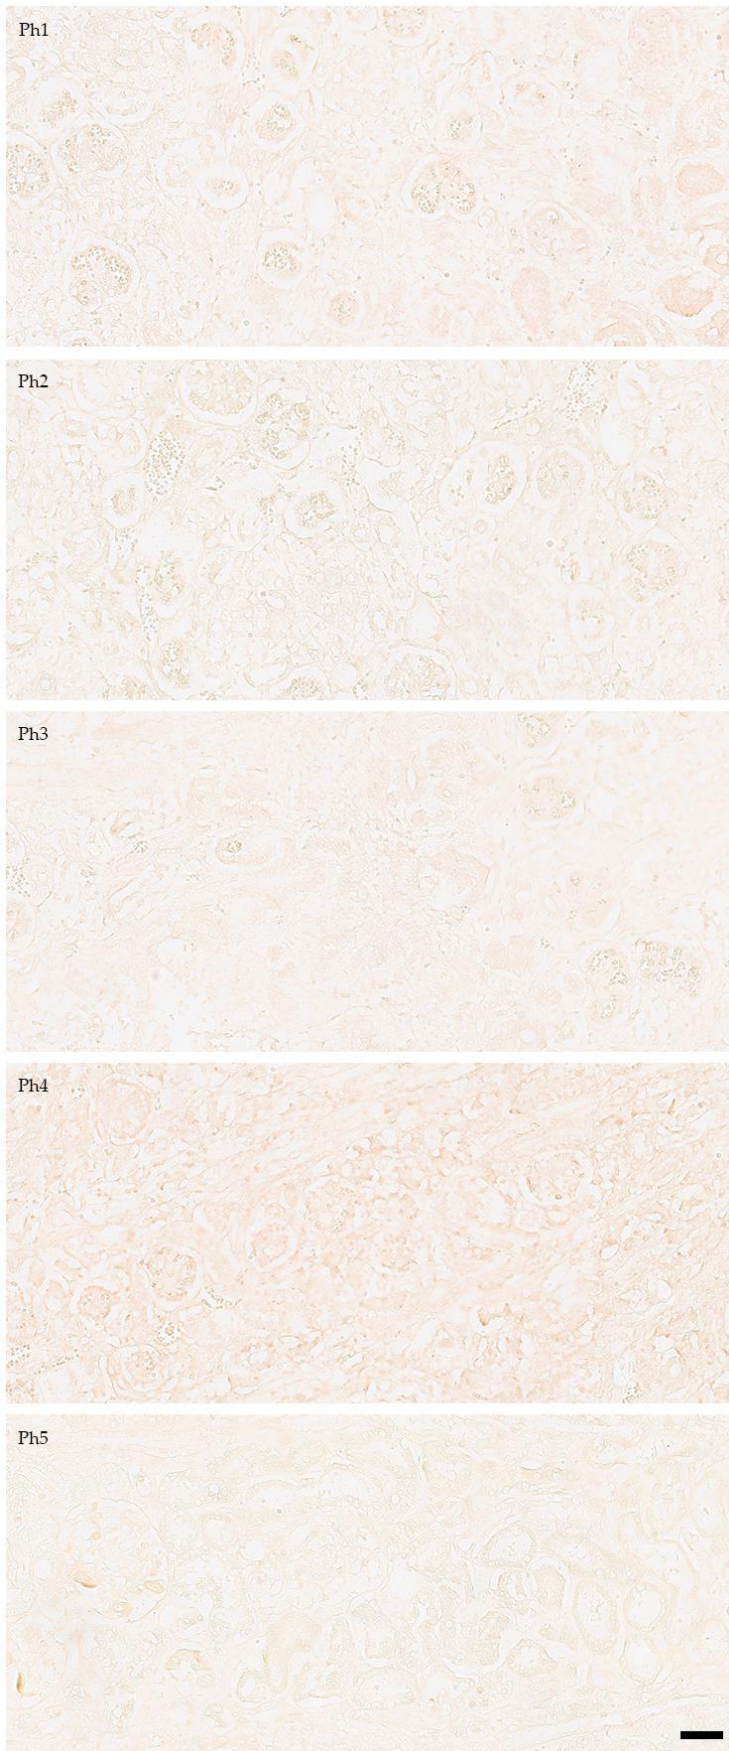

**Supplementary Figure S1.** Negative control for IHC staining, human fetal (Ph1-4) and postnatal (Ph5) kidneys (for Figures 1 and 5). Magnification 20x. Scale bar is 40  $\mu\text{m}$ .

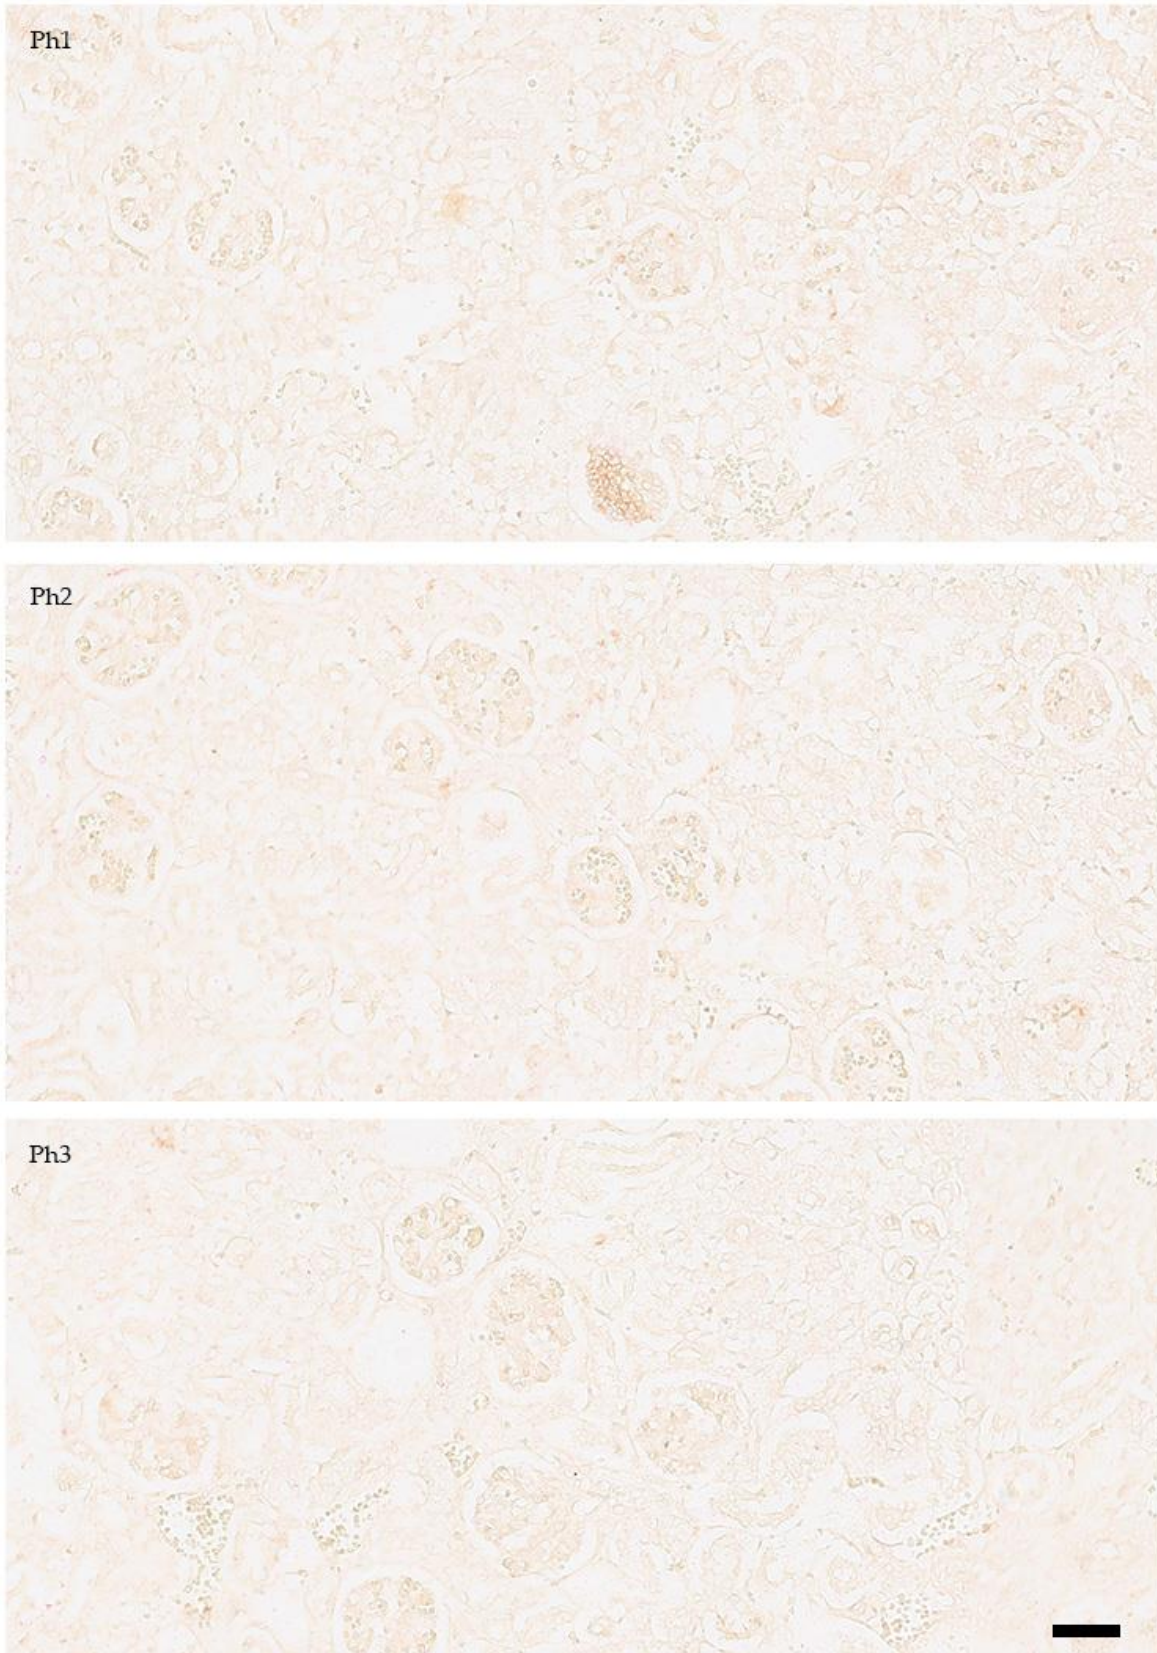

**Supplementary Figure S2.** Negative control for co-localization double immunohistochemistry staining, human fetal (Ph1-3) kidneys (for Figure 10). Magnification 20x. Scale bar is 40  $\mu\text{m}$ .
